# Supplementary material for: Preparation of PE/GO nanocomposites using in situ polymerization over an efficient, thermally stable GO-supported V-based catalyst
Source: Royal Society of Chemistry journal article supplement (doi:10.1039/c6ra00746e), 2016-01-01
Supplement: c6ra00746e1.pdf [file c6ra00746e1.pdf]

## Preparation of PE/GO Nanocomposites Using In-situ Polymerization over An Efficient, Thermally Stable GO-supported V-based Catalyst

He-Xin Zhang,<sup>a,b</sup> Yan-Ming Hu,<sup>a</sup> Dong-Ho Lee,<sup>b</sup> Keun-Byoung Yoon<sup>b\*</sup> Xue-Quan Zhang<sup>a\*</sup>

<sup>a</sup>Key Lab. of Synthetic Rubber, Changchun Institute of Applied Chemistry, Chinese Academic of Science, China

<sup>b</sup>Department of Polymer Science and Engineering, Kyungpook National University, Korea

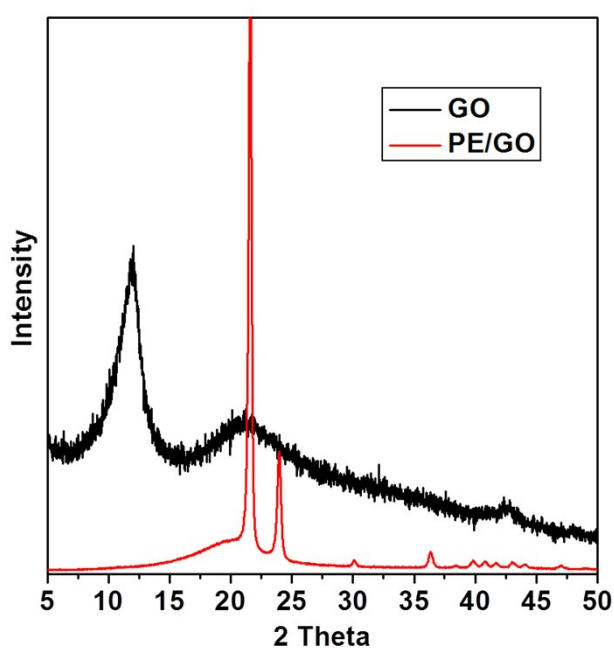

**Figure S1.** XRD patterns of GO and PE/GO
